# Supplementary figures and images for: Dynamic Changes of pStat3 are Involved in Meiotic Spindle Assembly in Mouse Oocytes
Source: Preprints.org preprint supplement (doi:10.20944/preprints202001.0184.v1), 2020-01-17

Figure S1: pStat3 localizes at the centrosome in various mammalian somatic cells.

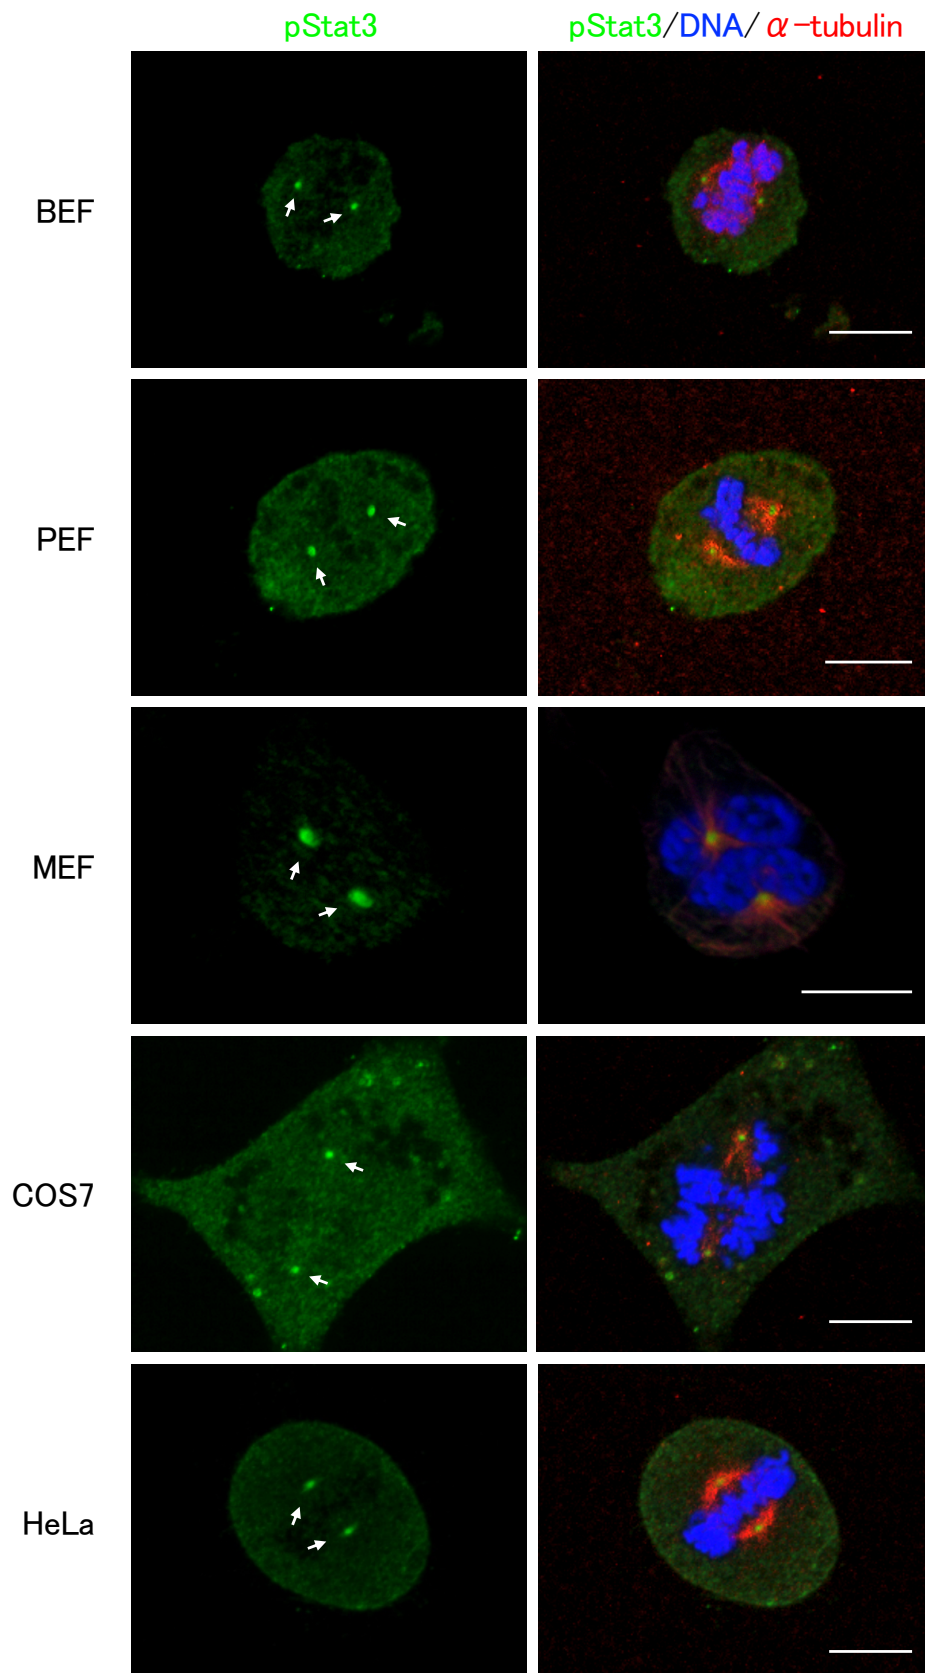

Supplement: Supplementary file 1 [file supplementary]
